# Supplementary material for: Construction of a Myc-associated ceRNA network reveals a prognostic signature in hepatocellular carcinoma
Source: PubMed Central journal article supplement (PMC8167205; doi:10.1016/j.omtn.2021.04.019), 2021-05-01
Supplement: mmc1.pdf [file mmc1.pdf]

**OMTN, Volume 24**

**Supplemental information**

**Construction of a Myc-associated ceRNA  
network reveals a prognostic signature  
in hepatocellular carcinoma**

**Dan-Dan Zhang, Yi Shi, Ji-Bin Liu, Xiao-Li Yang, Rui Xin, Hui-Min Wang, Pei-Yao Wang, Cheng-You Jia, Wen-Jie Zhang, Yu-Shui Ma, and Da Fu**

**Table S1. Correlation analysis between SEC14L2, SLC6A1 and biomarkers of immune cells in HCC**

| Description      | Gene markers  | SEC14L2 |          | SLC6A1 |          |
|------------------|---------------|---------|----------|--------|----------|
|                  |               | Cor     | P        | Cor    | P        |
| CD8+ T cell      | CD8A          | -0.211  | 4.32e-05 | -0.129 | 1.32e-02 |
|                  | CD8B          | -0.259  | 4.28e-07 | -0.239 | 3.19e-06 |
| T cell (general) | CD3D          | -0.411  | 0e+00    | -0.3   | 4.3e-09  |
|                  | CD3E          | -0.326  | 1.54e-10 | -0.195 | 1.6e-04  |
|                  | CD2           | -0.346  | 9.7e-12  | -0.203 | 8.81e-05 |
| B cell           | CD19          | -0.24   | 2.86e-06 | -0.121 | 1.96e-02 |
|                  | CD79A         | -0.274  | 8.33e-08 | -0.136 | 8.84e-03 |
| Monocyte         | CD86          | -0.282  | 3.78e-08 | -0.235 | 5.04e-06 |
|                  | CD115 (CSF1R) | -0.194  | 1.68e-04 | -0.253 | 8.76e-07 |
| TAM              | CCL2          | -0.075  | 1.48e-01 | -0.133 | 1.05e-02 |
|                  | CD68          | -0.293  | 1.07e-08 | -0.292 | 1.21e-08 |
|                  | IL10          | -0.23   | 7.39e-06 | -0.156 | 2.51e-03 |
| M1 Macrophage    | INOS (NOS2)   | 0.174   | 7.9e-04  | 0.243  | 2.15e-06 |
|                  | IRF5          | -0.111  | 3.23e-02 | 0.139  | 7.13e-03 |
|                  | COX2 (PTGS2)  | -0.185  | 3.48e-04 | -0.099 | 5.79e-02 |
| M2 Macrophage    | CD163         | 0.008   | 8.73e-01 | -0.061 | 2.38e-01 |
|                  | VSIG4         | -0.053  | 3.1e-01  | -0.15  | 3.92e-03 |

|                     |                    |        |          |        |          |
|---------------------|--------------------|--------|----------|--------|----------|
|                     | MS4A4A             | -0.109 | 3.63e-02 | -0.148 | 4.37e-03 |
| Neutrophils         | CD66b<br>(CEACAM8) | -0.064 | 2.19e-01 | -0.073 | 1.61e-01 |
|                     | CD11b (ITGAM)      | -0.147 | 4.45e-03 | -0.14  | 7.09e-03 |
|                     | CCR7               | -0.206 | 6.28e-05 | -0.042 | 4.2e-01  |
| Natural killer cell | KIR2DL1            | 0.049  | 3.46e-01 | -0.004 | 9.37e-01 |
|                     | KIR2DL3            | -0.002 | 9.67e-01 | 0.003  | 9.59e-01 |
|                     | KIR2DL4            | -0.079 | 1.31e-01 | -0.171 | 9.55e-04 |
|                     | KIR3DL1            | 0.085  | 1.04e-01 | 0.039  | 4.59e-01 |
|                     | KIR3DL2            | -0.064 | 2.2e-01  | -0.05  | 3.33e-01 |
|                     | KIR3DL3            | -0.036 | 4.88e-01 | -0.003 | 9.58e-01 |
|                     | KIR2DS4            | 0.02   | 6.95e-01 | 0.017  | 7.48e-01 |
| Dendritic cell      | HLA-DPB1           | -0.195 | 1.67e-04 | -0.256 | 6.23e-07 |
|                     | HLA-DQB1           | -0.209 | 5.37e-05 | -0.23  | 8.06e-06 |
|                     | HLA-DRA            | -0.131 | 1.16e-02 | -0.208 | 5.7e-05  |
|                     | HLA-DPA1           | -0.144 | 5.48e-03 | -0.164 | 1.6e-03  |
|                     | BDCA-1(CD1C)       | -0.186 | 3.1e-04  | -0.043 | 4.12e-01 |
|                     | BDCA-4(NRP1)       | -0.093 | 7.41e-02 | -0.046 | 3.79e-01 |
|                     | CD11c(ITGAX)       | -0.274 | 9.59e-08 | -0.156 | 2.6e-03  |
| Th1                 | T-bet (TBX21)      | -0.087 | 9.45e-02 | -0.071 | 1.7e-01  |
|                     | STAT4              | -0.285 | 2.53e-08 | 0.006  | 9.05e-01 |
|                     | STAT1              | -0.185 | 3.59e-04 | 0.05   | 3.41e-01 |

|                   |                      |        |          |        |          |
|-------------------|----------------------|--------|----------|--------|----------|
|                   | IFN- $\gamma$ (IFNG) | -0.169 | 1.08e-03 | -0.149 | 4.01e-03 |
|                   | TNF- $\alpha$ (TNF)  | -0.236 | 4.31e-06 | -0.146 | 4.92e-03 |
| Th2               | GATA3                | -0.302 | 3.04e-09 | -0.145 | 5e-03    |
|                   | STAT6                | 0.119  | 2.2e-02  | 0.159  | 2.19e-03 |
|                   | STAT5A               | -0.134 | 9.66e-03 | -0.09  | 8.2e-02  |
|                   | IL13                 | 0.056  | 2.84e-01 | 0.189  | 2.56e-04 |
| Tfh               | BCL6                 | 0.104  | 4.53e-02 | 0.081  | 1.19e-01 |
|                   | IL21                 | -0.1   | 5.47e-02 | -0.026 | 6.24e-01 |
| Th17              | STAT3                | -0.035 | 5.01e-01 | 0.075  | 1.5e-01  |
|                   | IL17A                | -0.061 | 2.44e-01 | 0.04   | 4.43e-01 |
| Treg              | FOXP3                | 0.198  | 1.27e-04 | 0.276  | 6.83e-08 |
|                   | CCR8                 | -0.201 | 9.49e-05 | 0.044  | 3.97e-01 |
|                   | STAT5B               | 0.214  | 3.45e-05 | 0.423  | 0e+00    |
|                   | TGF $\beta$ (TGFB1)  | -0.43  | 0e+00    | -0.243 | 2.34e-06 |
| T cell exhaustion | PD-1 (PDCD1)         | -0.41  | 1.83e-16 | -0.245 | 1.75e-06 |
|                   | CTLA4                | -0.441 | 4.73e-19 | -0.301 | 3.4e-09  |
|                   | LAG3                 | -0.209 | 4.97e-05 | -0.159 | 2.08e-03 |
|                   | TIM-3 (HAVCR2)       | -0.345 | 1.19e-11 | -0.248 | 1.49e-06 |
|                   | GZMB                 | -0.105 | 4.34e-02 | -0.196 | 1.48e-04 |

---

**Table S2. Correlation analysis between SEC14L2 and biomarkers of T cell (general), monocyte, TAM and T cell exhaustion in GEPIA.**

| Description       | Gene markers | LIHC(SEC14L2) |       |         |       |
|-------------------|--------------|---------------|-------|---------|-------|
|                   |              | Tumor         |       | Normal  |       |
|                   |              | R             | P     | R       | P     |
| T cell (general)  | CD3D         | -0.22         | ***   | -0.13   | 0.37  |
|                   | CD3E         | -0.16         | *     | -0.092  | 0.52  |
|                   | CD2          | -0.17         | **    | -0.11   | 0.44  |
| Monocyte          | CD86         | -0.2          | ***   | -0.16   | 0.26  |
|                   | CD115        | -0.14         | *     | -0.05   | 0.73  |
| TAM               | CCL2         | -0.11         | 0.035 | -0.24   | 0.098 |
|                   | CD68         | -0.14         | *     | -0.076  | 0.6   |
|                   | IL10         | -0.085        | 0.1   | 0.17    | 0.24  |
| T cell exhaustion | PD-1         | -0.15         | *     | 0.0016  | 0.99  |
|                   | CTLA4        | -0.24         | ***   | -0.088  | 0.54  |
|                   | LAG3         | -0.16         | *     | 0.00031 | 1     |
|                   | TIM-3        | -0.16         | *     | -0.24   | 0.086 |
|                   | GZMB         | -0.15         | *     | -0.085  | 0.56  |

\*P<0.01, \*\* P<0.001, \*\*\* P<0.0001.

**Table S3. Univariate analysis of overall survival in LIHC patients stratified based on clinical characteristics.**

| Factor | Variable  | N   | SLC6A1 |         | SEC14L2 |         | Overall survival |             |                         |
|--------|-----------|-----|--------|---------|---------|---------|------------------|-------------|-------------------------|
|        |           |     | median | P value | median  | P value | Months (median)  | 95%CI       | P value (Log-rank test) |
| Age    | ≥ 60      | 200 | 19.91  | 0.511   | 18.99   | 0.001   | 21.05            | 23.21-29.95 | 0.272                   |
|        | <60       | 169 | 19.24  |         | 9.45    |         | 18.53            | 23.28-30.68 |                         |
| Gender | male      | 248 | 18.05  | 0.137   | 15.26   | 0.001   | 19.07            | 23.21-29.05 | 0.257                   |
|        | female    | 121 | 24.1   |         | 8.95    |         | 21.07            | 23.39-32.75 |                         |
| BMI    | ≤ 18.5    | 21  | 12     | 0.005   | 8.32    | 0.266   | 19.57            | 14.04-43.23 | 0.133                   |
|        | 18.5-23.9 | 135 | 17.1   |         | 11.38   |         | 15.63            | 19.31-26.56 |                         |
|        | 24-27.9   | 80  | 21.93  |         | 14.07   |         | 21.45            | 25.87-37.91 |                         |
|        | ≥ 28      | 97  | 21.63  |         | 16.9    |         | 23.27            | 25.22-34.93 |                         |
| Race   | yellow    | 157 | 17.64  | 0.197   | 12.03   | 0.539   | 17.83            | 22.28-29.56 | 0.196                   |
|        | white     | 184 | 21.28  |         | 13.41   |         | 22.22            | 24.65-32.17 |                         |
|        | other     | 28  | 15.7   |         | 18.66   |         | 16.65            | 13.53-27.80 |                         |

|                       |          |     |       |       |       |       |       |             |       |
|-----------------------|----------|-----|-------|-------|-------|-------|-------|-------------|-------|
| TNM stage             | I-II     | 255 | 20.21 | 0.032 | 15.13 | 0.062 | 20.27 | 25.49-31.63 | 0     |
|                       | III-IV   | 90  | 16.51 |       | 8.87  |       | 13.67 | 17.44-27.31 |       |
|                       | Unknown  | 24  | 28.31 |       | 20.48 |       | 24.52 | 17.05-31.18 |       |
| Diameter              | < 5cm    | 273 | 20.26 | 0.022 | 15.13 | 0.022 | 19.87 | 24.95-30.90 | 0.004 |
|                       | ≥ 5cm    | 93  | 17.27 |       | 9.22  |       | 18.6  | 19.13-28.23 |       |
| Lymph-node metastasis | Negative | 251 | 18.5  | 0.149 | 3.44  | 0.58  | 20.27 | 26.33-32.95 | 0.001 |
|                       | Positive | 4   | 27.45 |       | 4.03  |       | 20.55 | 5.33-34.67  |       |
|                       | Unknown  | 113 | 21.24 |       | 15.15 |       | 18.5  | 17.67-23.98 |       |
| Distant metastasis    | Negative | 265 | 18.5  | 0.096 | 12.16 | 0.094 | 20.03 | 25.38-31.61 | 0.031 |
|                       | Positive | 4   | 5.13  |       | 2.71  |       | 6.6   | 10.81-31.65 |       |
|                       | Unknown  | 100 | 21.94 |       | 16.26 |       | 18.57 | 18.99-26.66 |       |
| Prior malignancy      | Yes      | 35  | 20.09 | 0.432 | 24.98 | 0.172 | 20.03 | 15.73-28.97 | 0.013 |
|                       | No       | 334 | 19.54 |       | 12.59 |       | 19.58 | 24.57-29.88 |       |

---

**Table S4. Univariate analysis of overall survival in LIHC patients stratified based on clinical Characteristics**

| Factor    | Variable  | N   | LINC02499 |         | Overall survival   |             |                            |
|-----------|-----------|-----|-----------|---------|--------------------|-------------|----------------------------|
|           |           |     | median    | P value | Months<br>(median) | 95%CI       | P value<br>(Log-rank test) |
| Age       | ≥ 60      | 200 | 2.67      | 0.477   | 21.05              | 23.21-29.95 | 0.272                      |
|           | <60       | 169 | 2.78      |         | 18.53              | 23.28-30.68 |                            |
| Gender    | male      | 248 | 2.88      | 0.683   | 19.07              | 23.21-29.05 | 0.257                      |
|           | female    | 121 | 2.43      |         | 21.07              | 23.39-32.75 |                            |
| BMI       | ≤ 18.5    | 21  | 2.41      | 0.04    | 19.57              | 14.04-43.23 | 0.133                      |
|           | 18.5-23.9 | 135 | 2.09      |         | 15.63              | 19.31-26.56 |                            |
|           | 24-27.9   | 80  | 2.7       |         | 21.45              | 25.87-37.91 |                            |
|           | ≥ 28      | 97  | 3.3       |         | 23.27              | 25.22-34.93 |                            |
| Race      | yellow    | 157 | 2.16      | 0.013   | 17.83              | 22.28-29.56 | 0.196                      |
|           | white     | 184 | 3.28      |         | 22.22              | 24.65-32.17 |                            |
|           | other     | 28  | 2.6       |         | 16.65              | 13.53-27.80 |                            |
| TNM stage | I - II    | 255 | 2.53      | 0.767   | 20.27              | 25.49-31.63 | 0                          |
|           | III-IV    | 90  | 3.31      |         | 13.67              | 17.44-27.31 |                            |
|           | Unknown   | 24  | 2.8       |         | 24.52              | 17.05-31.18 |                            |



|                       |          |     |      |       |       |             |       |
|-----------------------|----------|-----|------|-------|-------|-------------|-------|
| Diameter              | < 5cm    | 273 | 2.6  | 0.38  | 19.87 | 24.95-30.90 | 0.004 |
|                       | ≥ 5cm    | 93  | 3.32 |       | 18.6  | 19.13-28.23 |       |
| Lymph-node metastasis | Negative | 251 | 2.42 | 0.048 | 20.27 | 26.33-32.95 | 0.001 |
|                       | Positive | 4   | 3.26 |       | 20.55 | 5.33-34.67  |       |
|                       | Unknown  | 113 | 3.52 |       | 18.5  | 17.67-23.98 |       |
| Distant metastasis    | Negative | 265 | 2.64 | 0.307 | 20.03 | 25.38-31.61 | 0.031 |
|                       | Positive | 4   | 4.36 |       | 6.6   | 10.81-31.65 |       |
| Prior malignancy      | Unknown  | 100 | 2.88 | 0.297 | 18.57 | 18.99-26.66 | 0.013 |
|                       | Yes      | 35  | 2.1  |       | 20.03 | 15.73-28.97 |       |
|                       | No       | 334 | 2.79 |       | 19.58 | 24.57-29.88 |       |

---

## Supplemental figure and legends

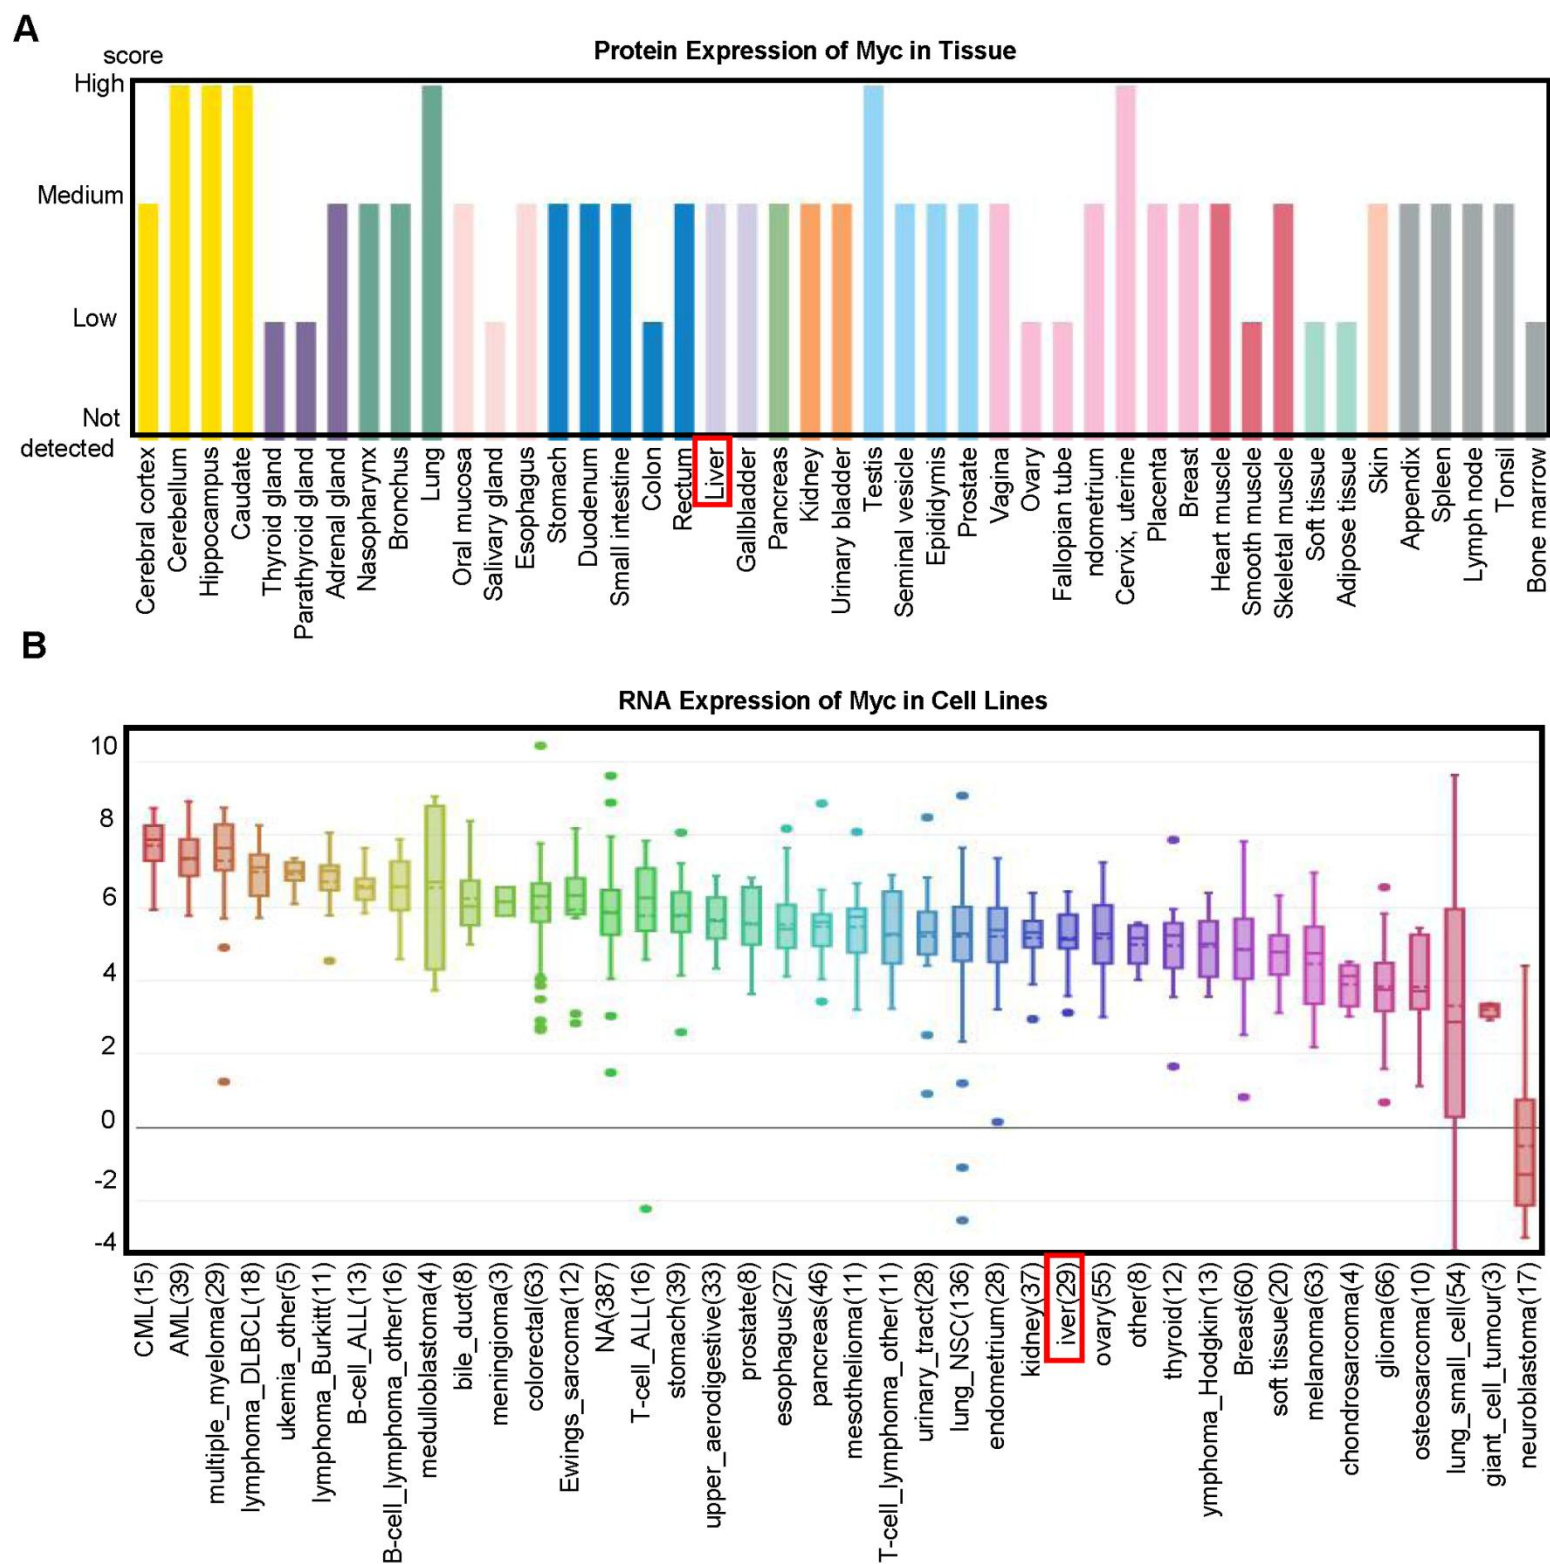

**Fig. S1. Myc expression.** (A) Expression of MYC in various normal organ tissues according to the HPA database. (B) Expression of Myc in cancer cell lines in CCLE.

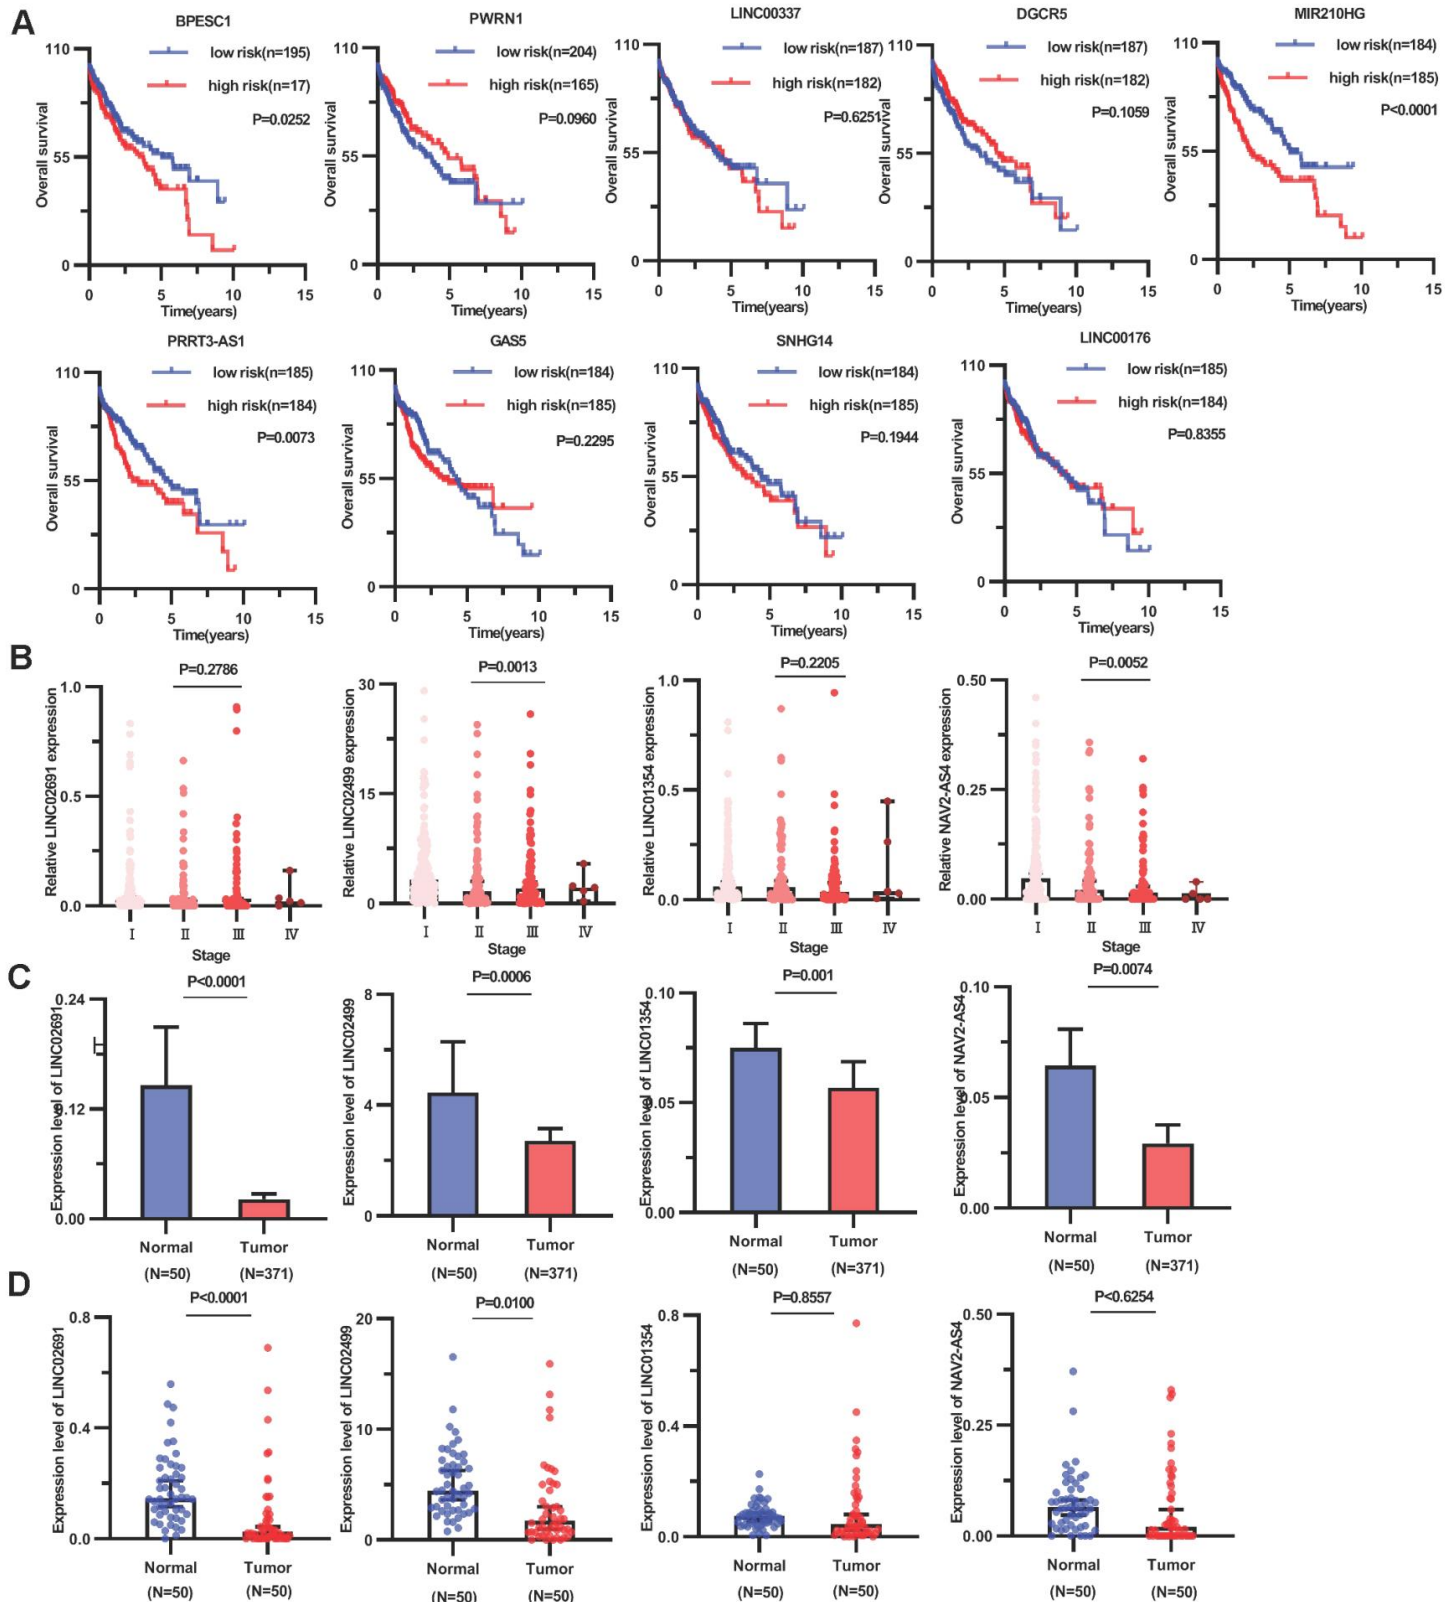

**Fig. S2 Analysis of LINC02691, LINC02499, LINC01354, and NAV2-AS4.** (A) Survival analysis. (B) TNM stage. (C) Differential expression in 371 HCC tissues and 50 adjacent normal tissues. (D) Validation of 50 paired cancer and paracancer tissues.

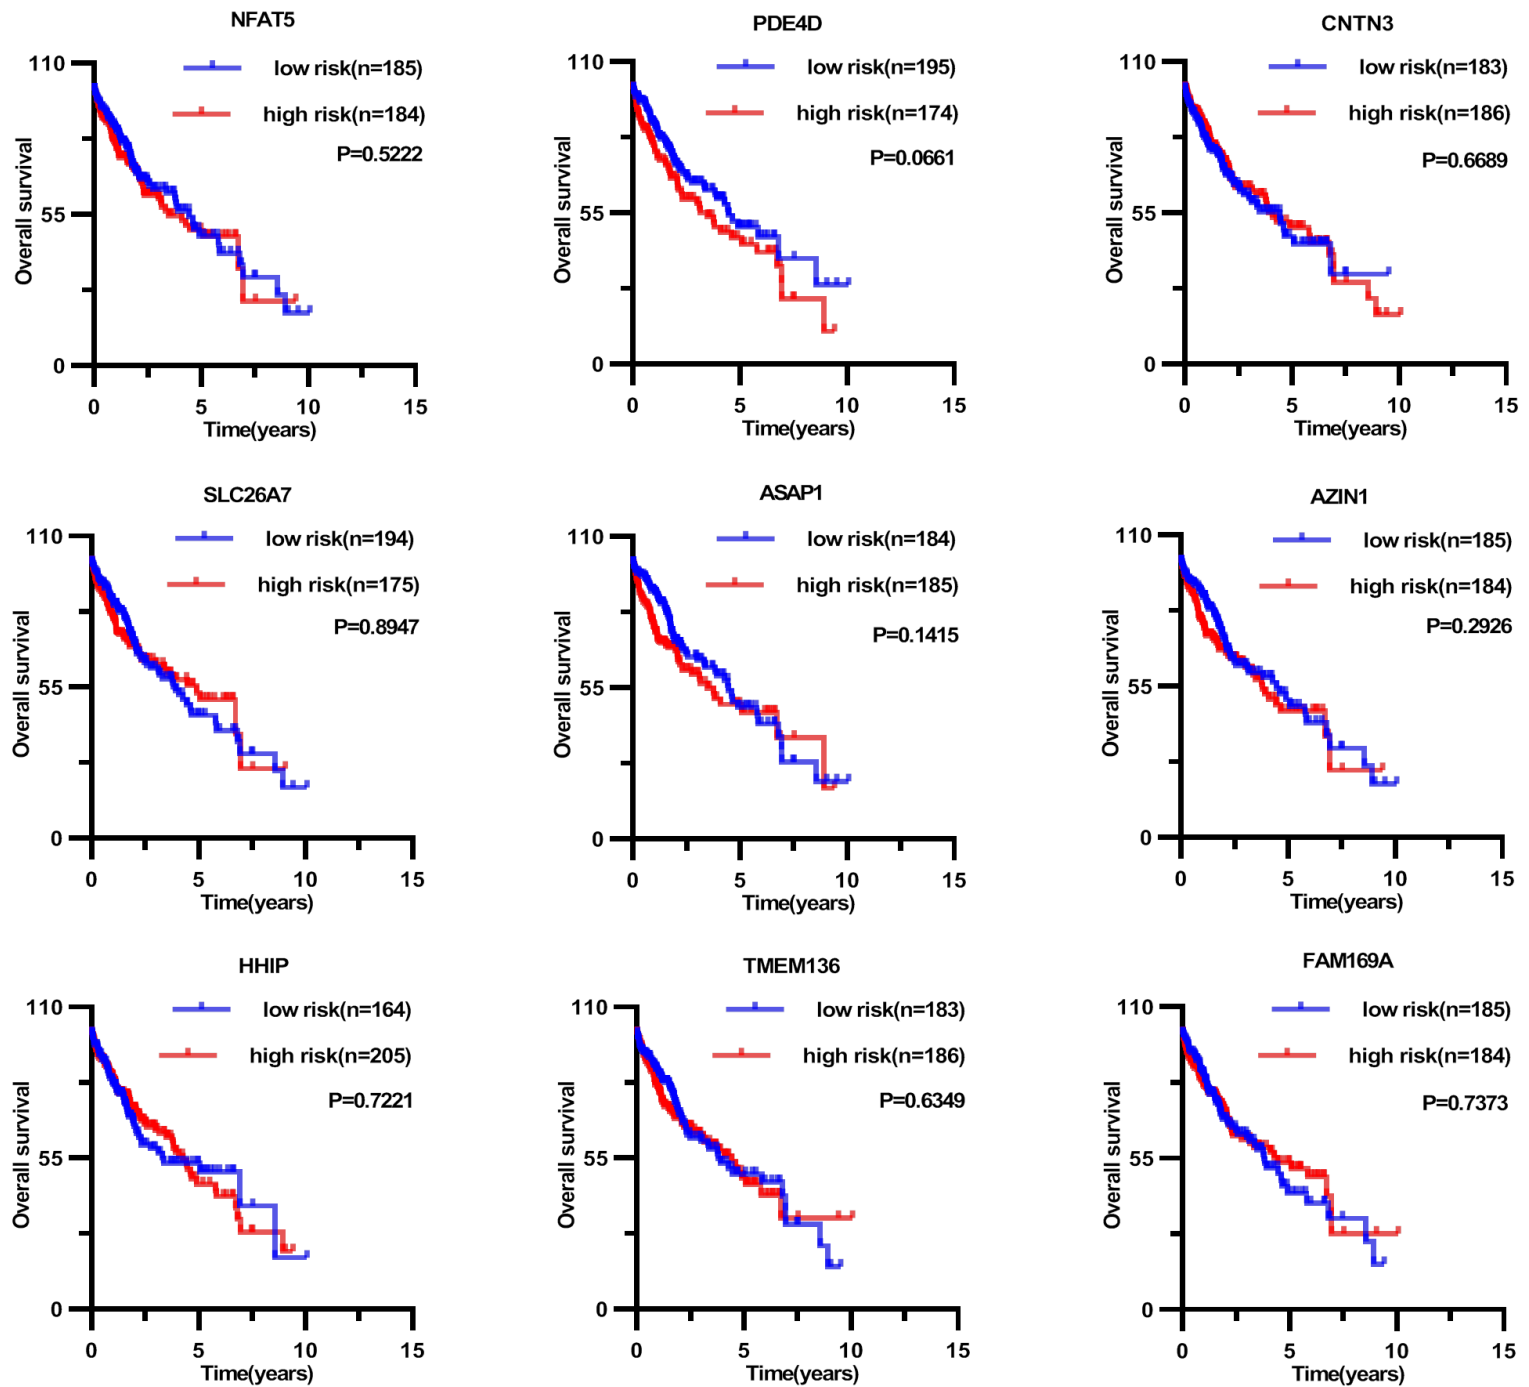

**Fig. S3. Kaplan–Meier analysis of genes.** Kaplan–Meier of genes that have no survival significance in the ceRNA network.

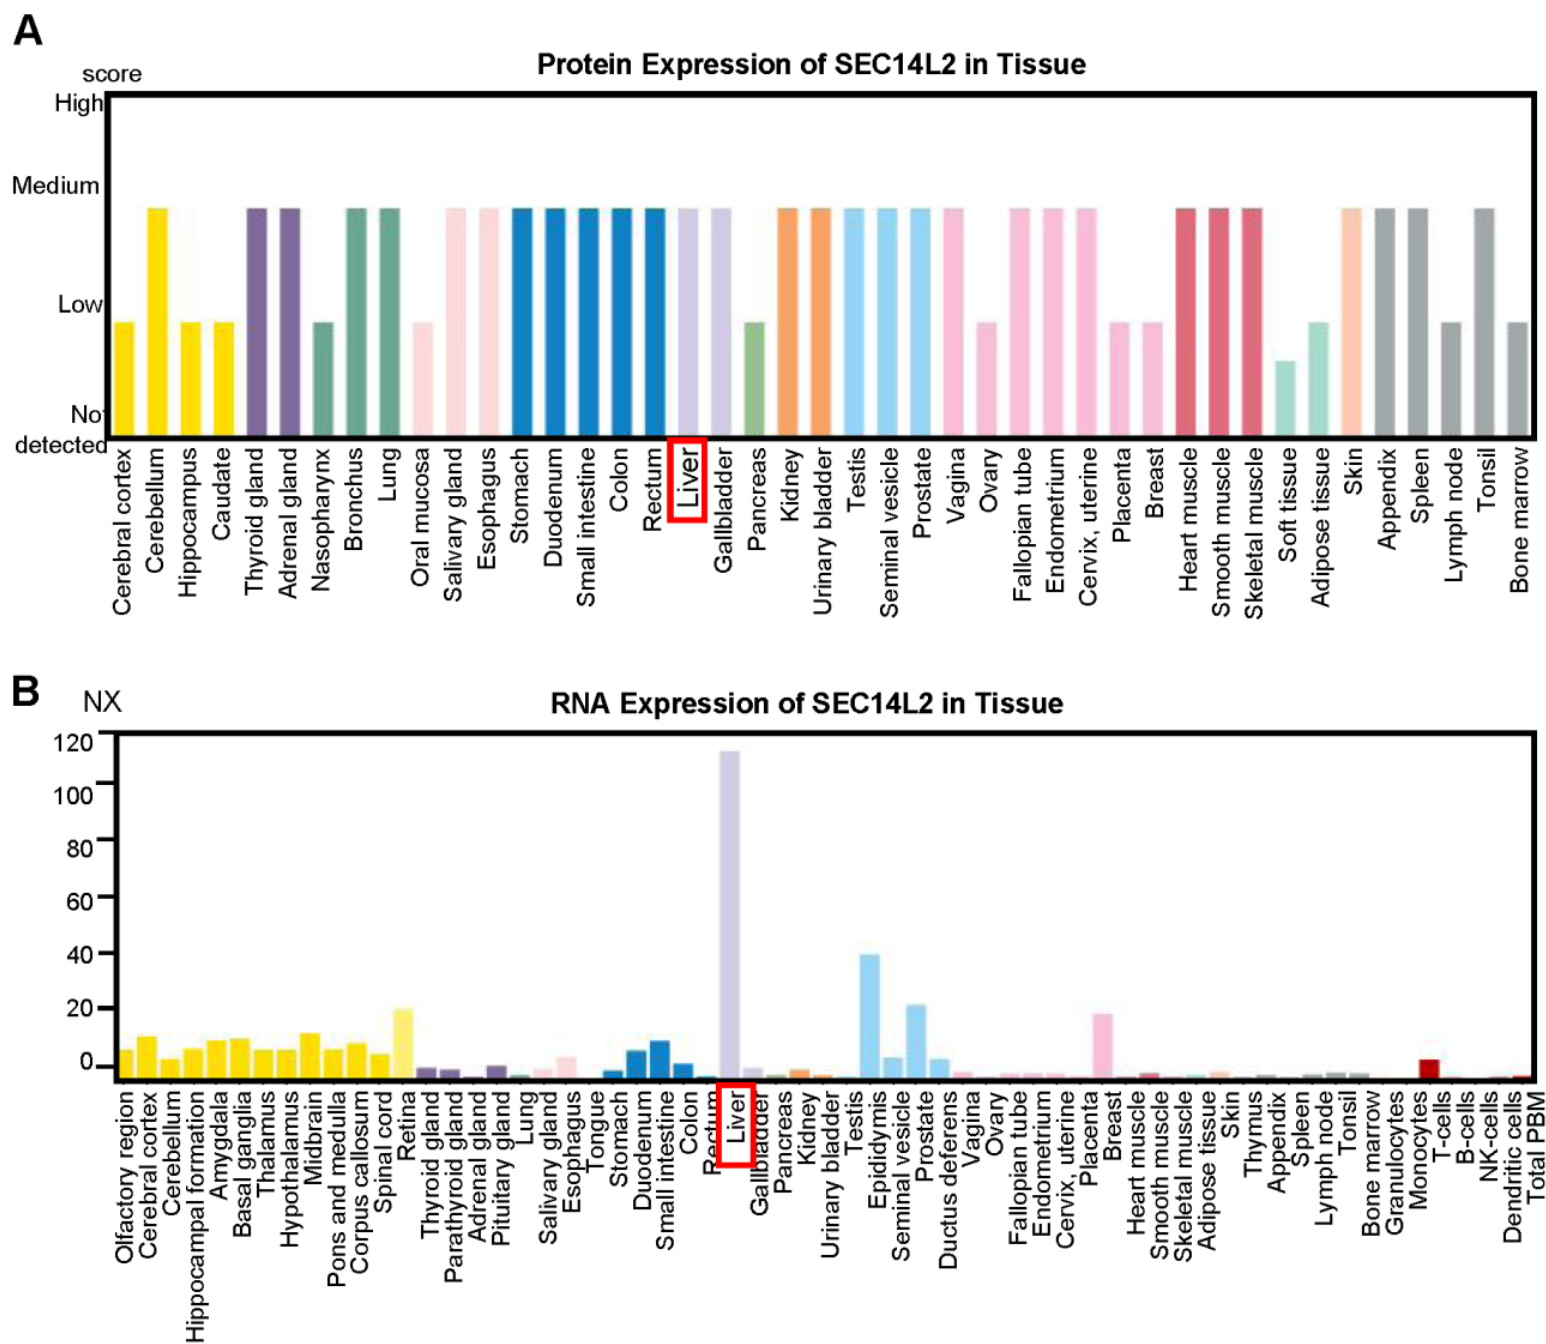

**Fig. S4.** The levels of SEC14L2 in various normal organ tissues. (A) Protein and (B) transcription levels of SEC14L2 in various normal organ tissues according to the HPA database.

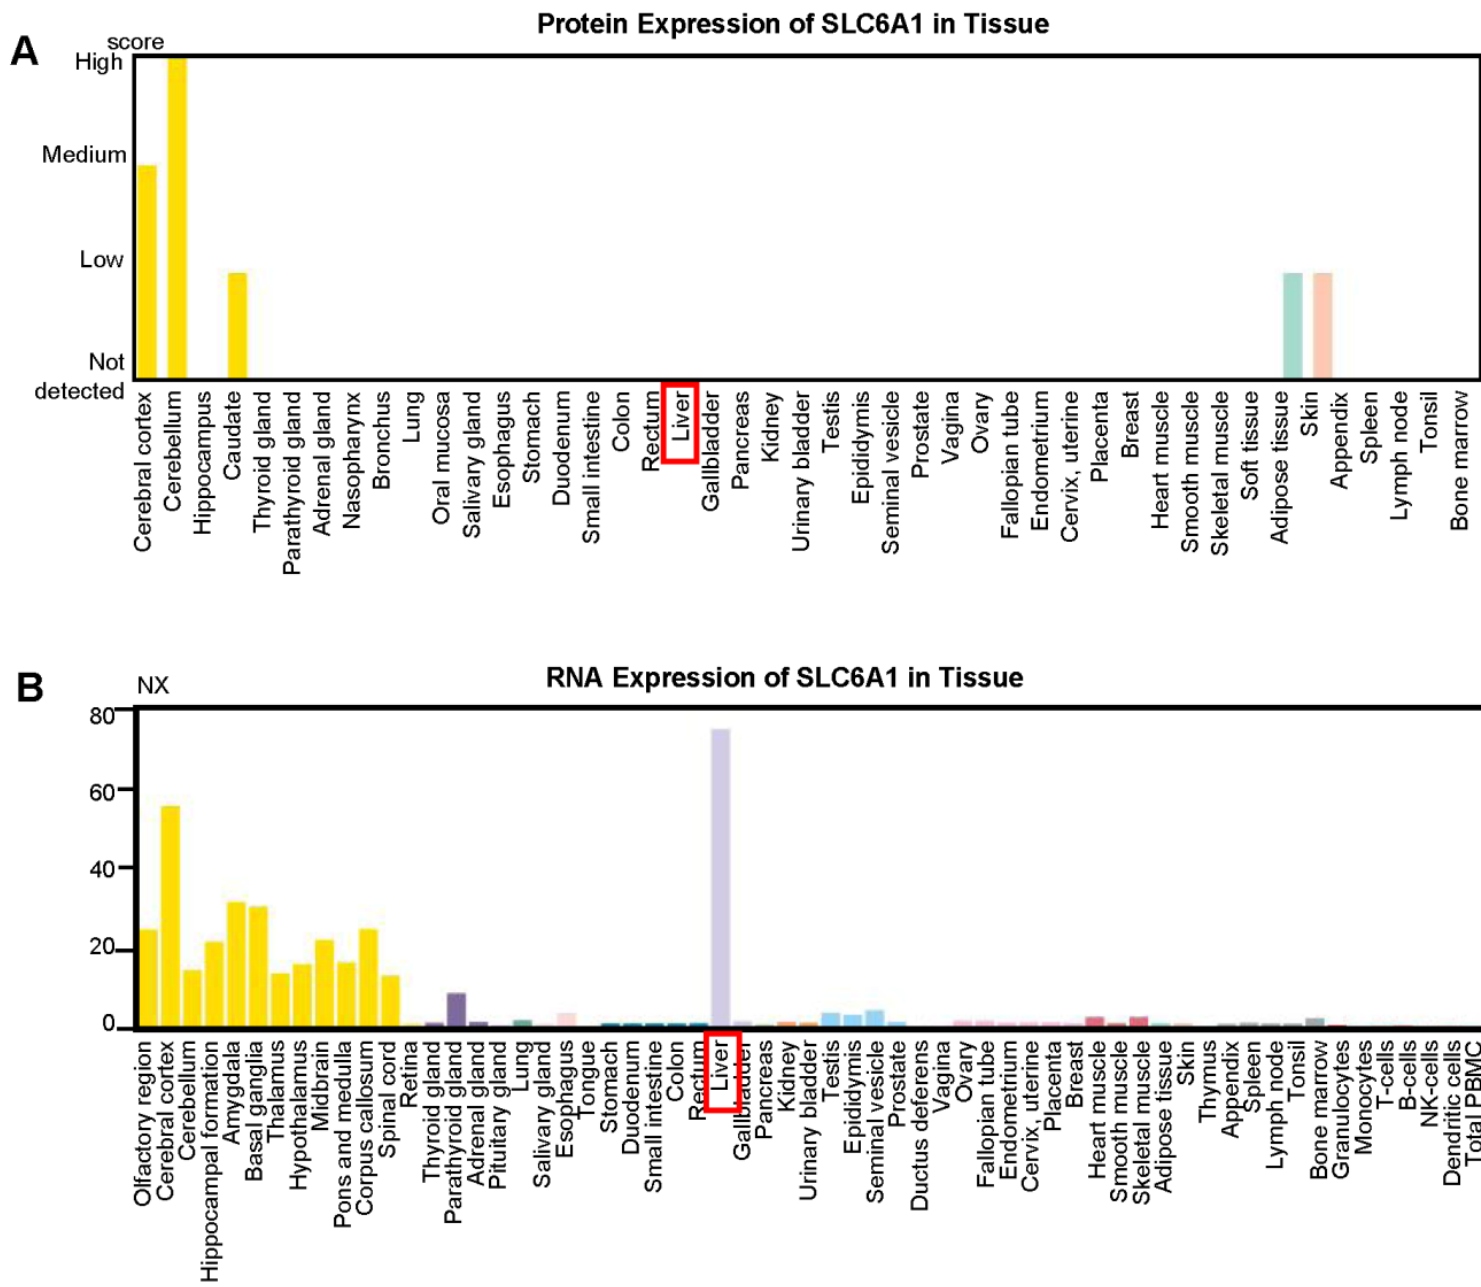

**Fig. S5. The levels of SLC6A1 in various normal organ tissues.** (A) Protein and (B) transcription levels of SLC6A1 in various normal organ tissues according to the HPA database.

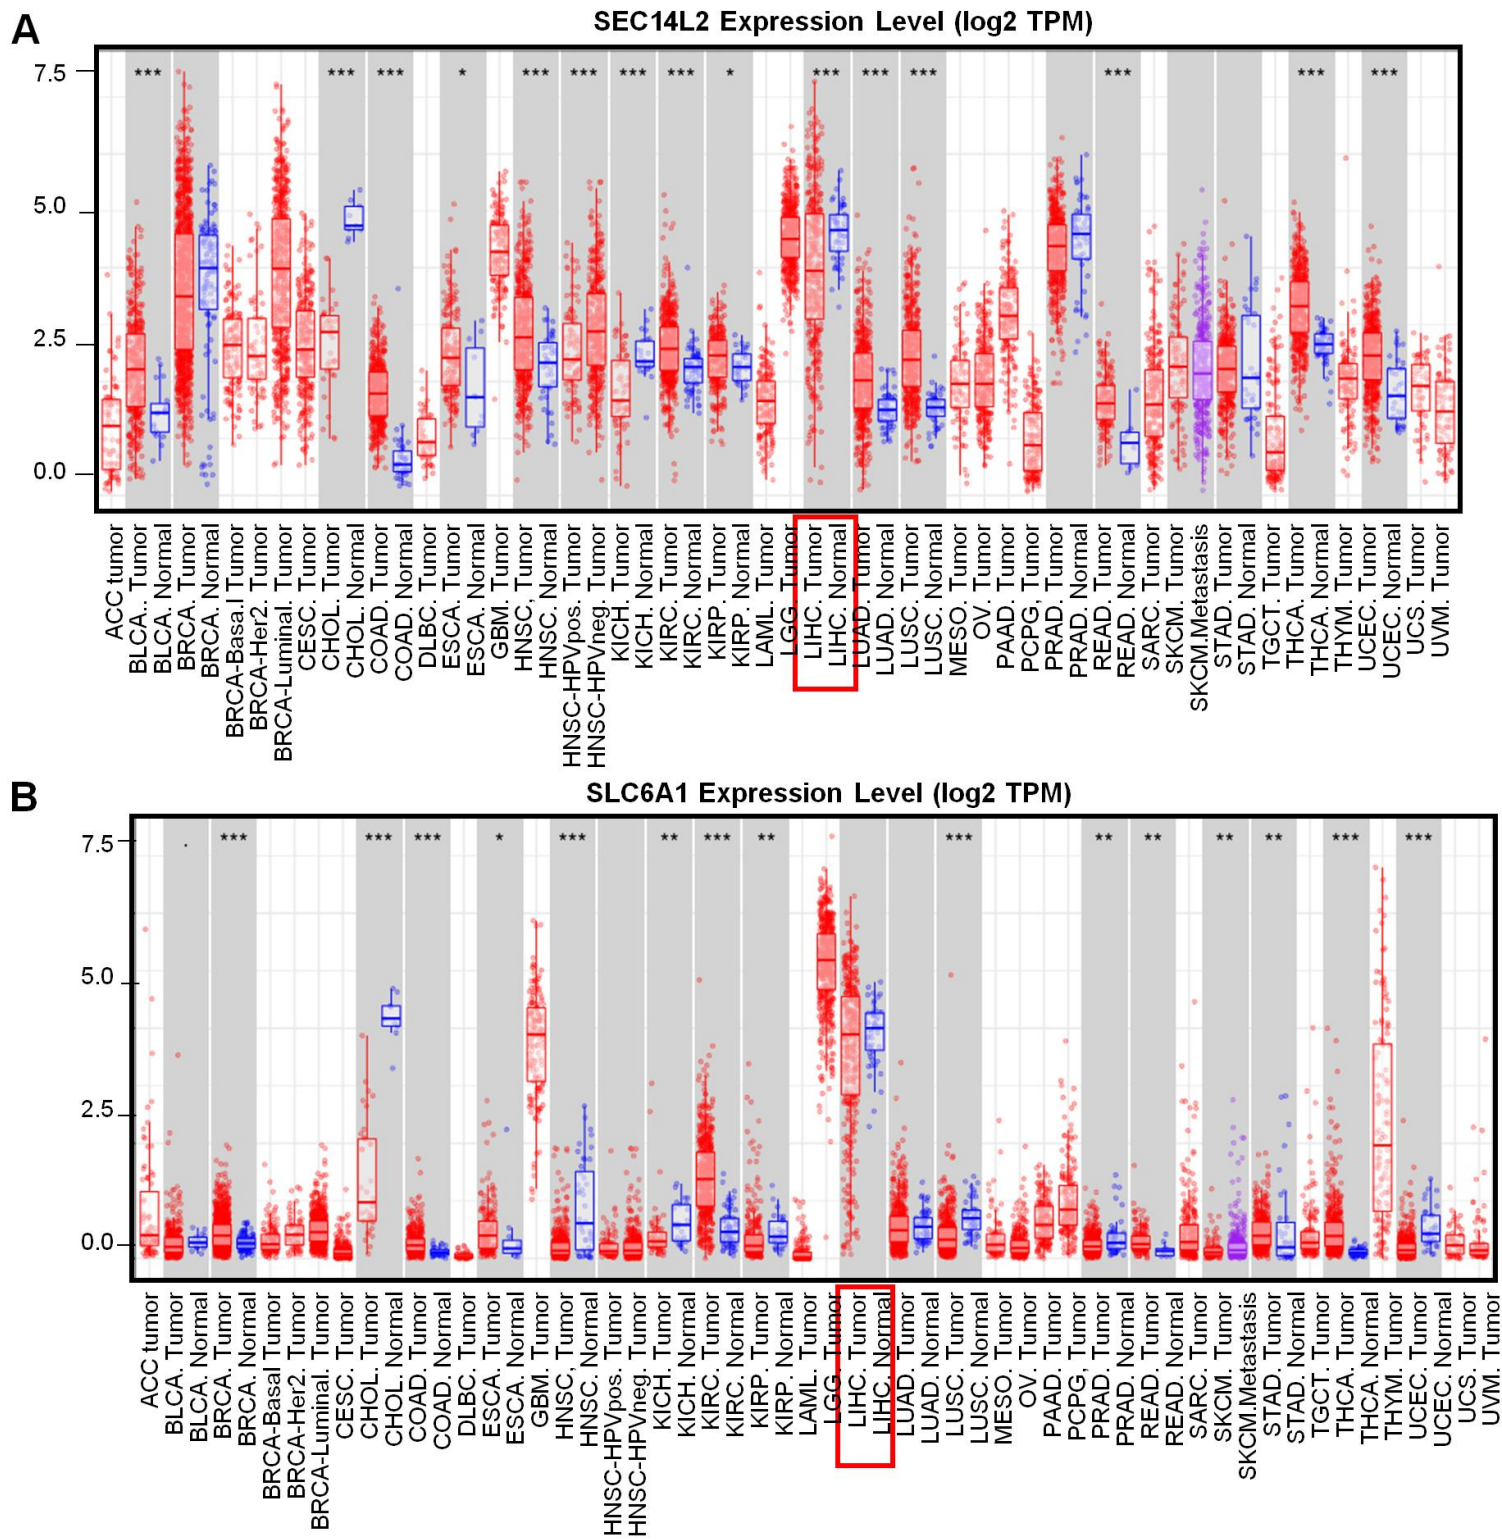

**Fig. S6. The SEC14L2 and SLC6A1 expressed levels.** (A) SEC14L2 and (B) SLC6A1 expression in different tumor tissues according to the TCGA database.

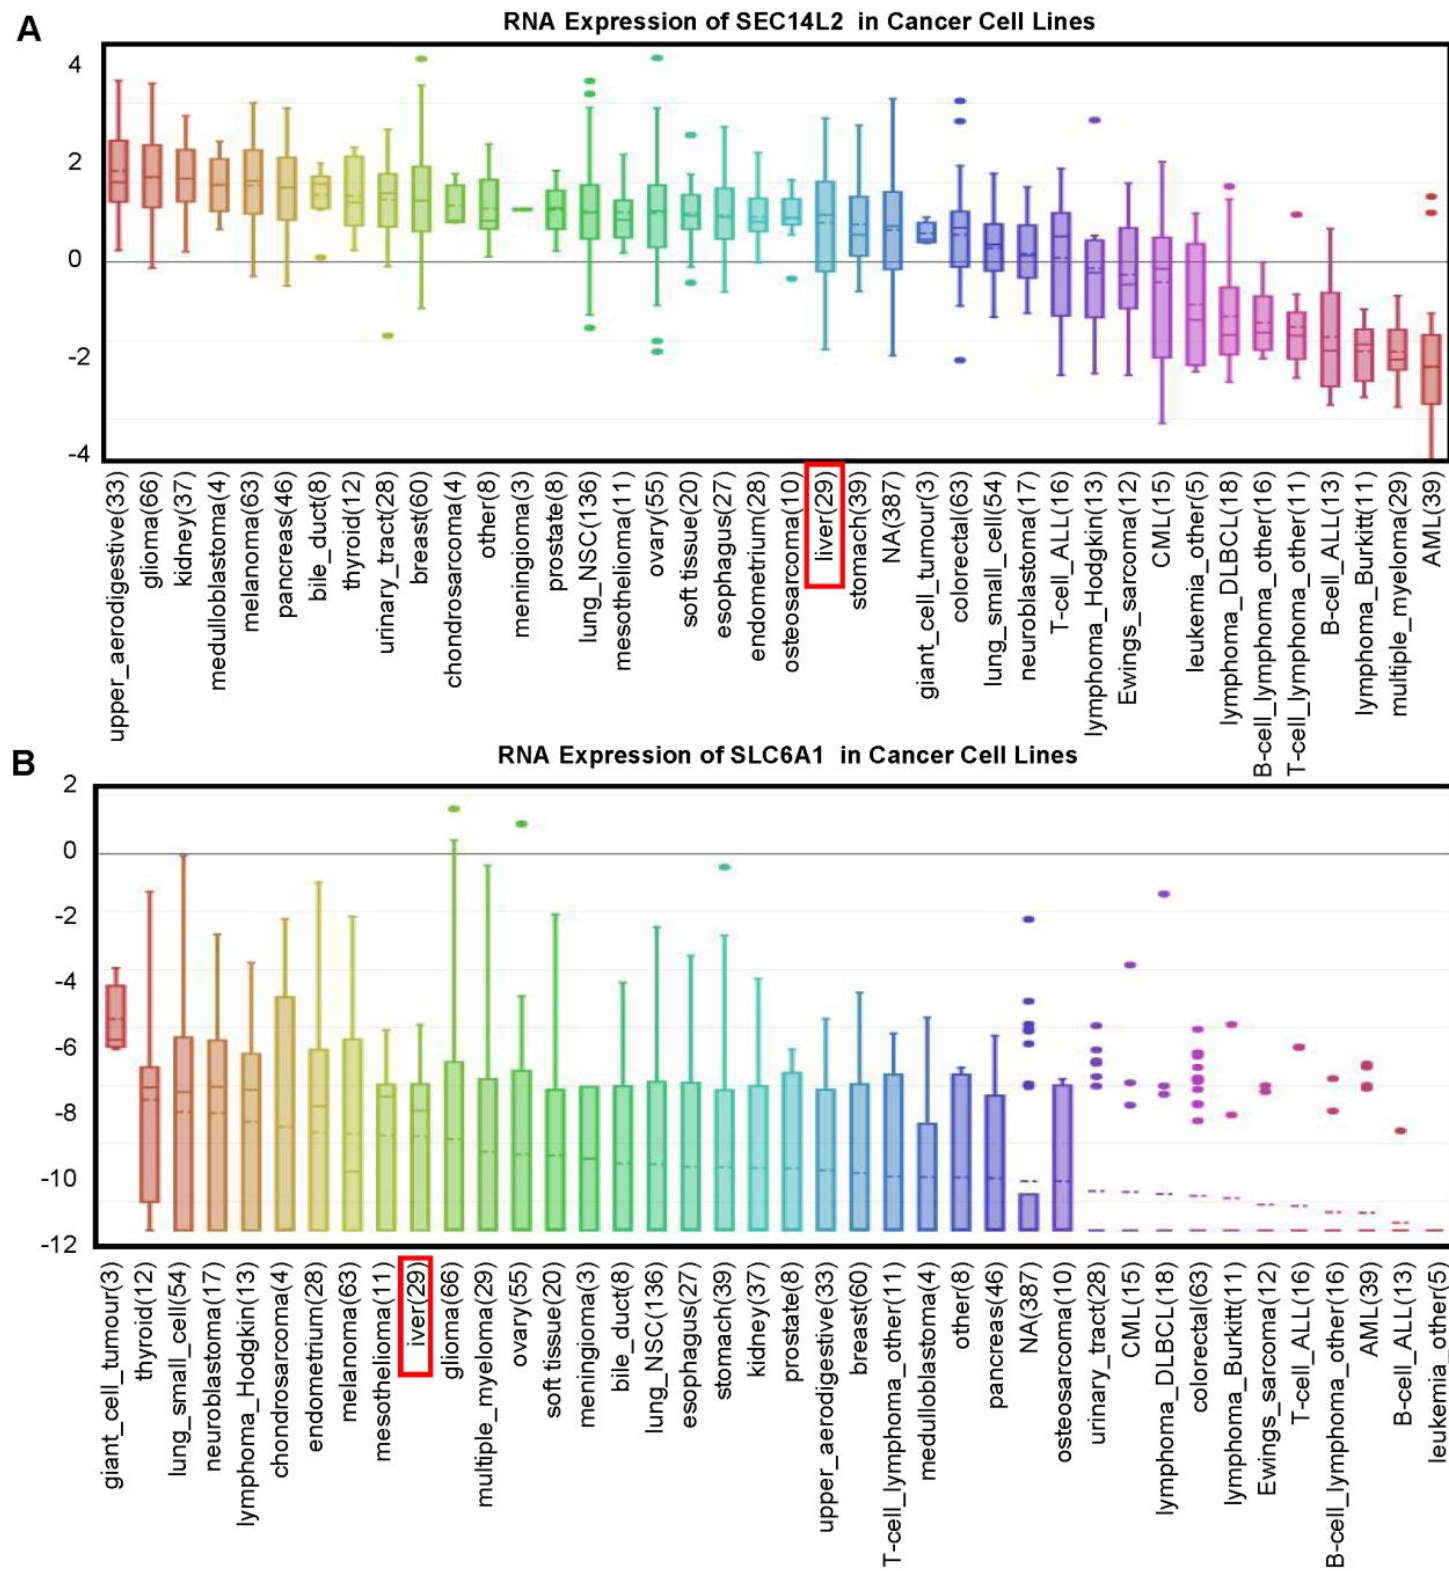

**Fig. S7. SEC14L2 and SLC6A1 expression levels in cancer cell lines.** The expression of (A) SEC14L2 and (B) SLC6A1 in cancer cell lines according to the Broad Institute CCLE.



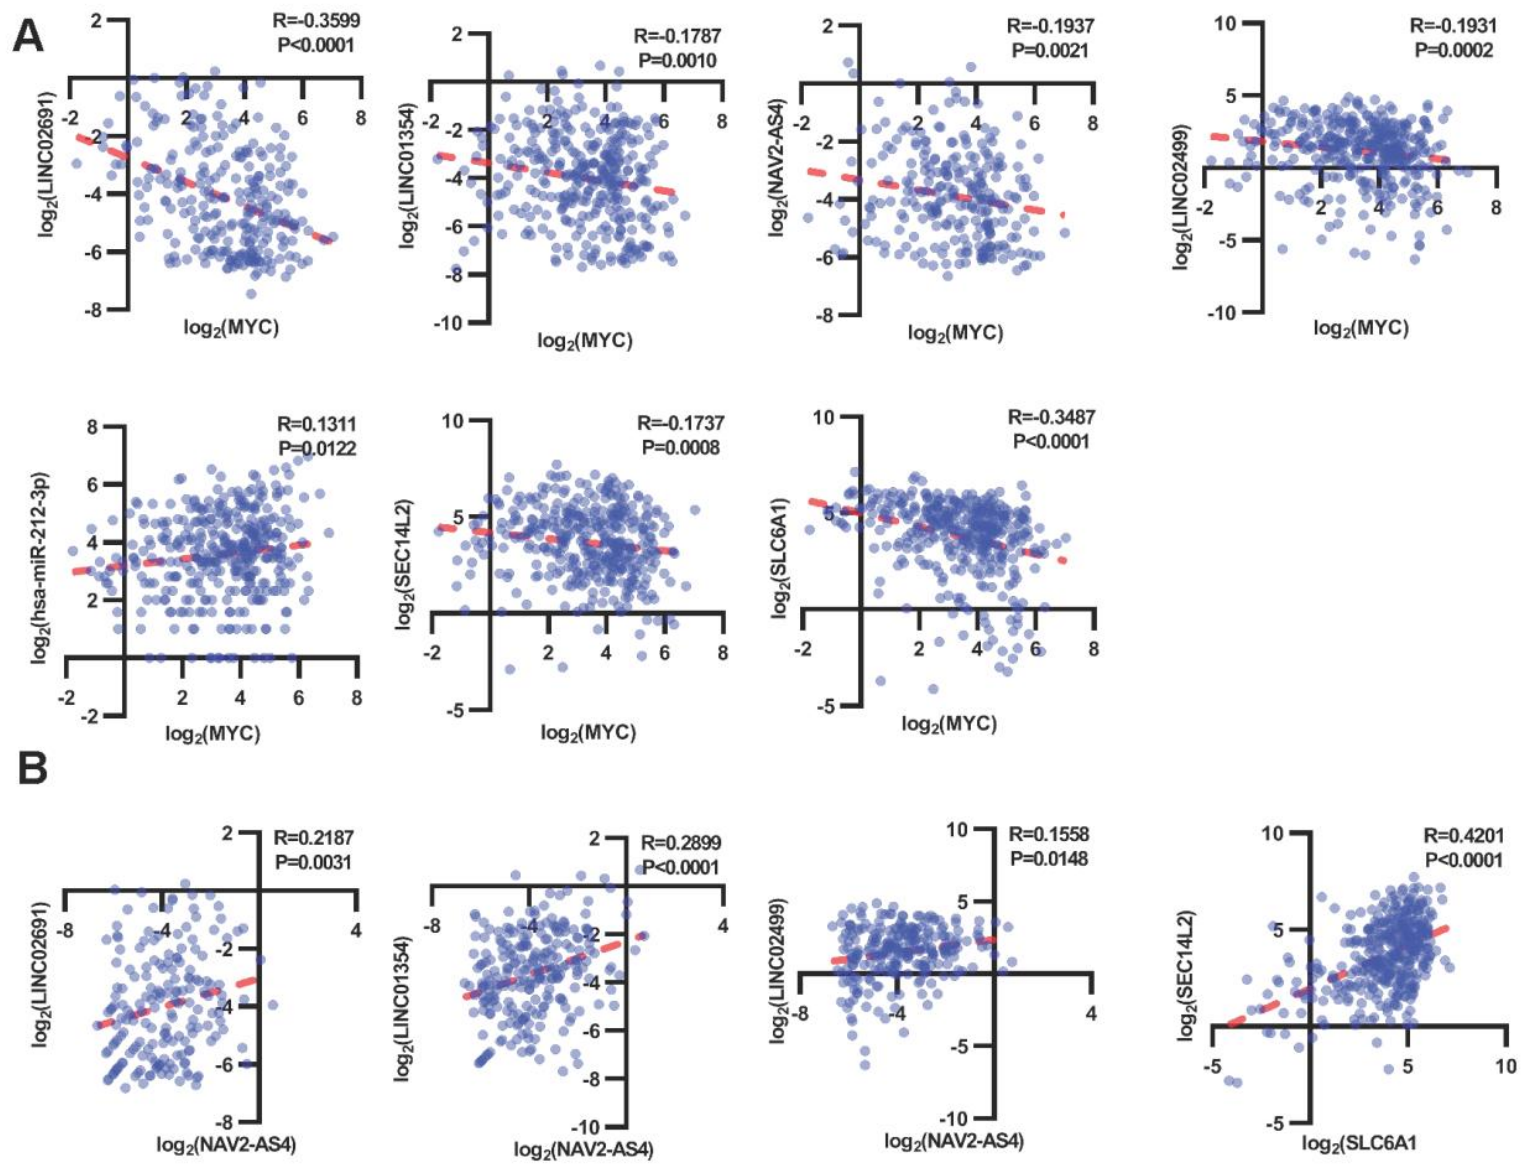

**Fig. S8. Correlation among lncRNAs, miRNAs, and mRNAs.** (A) Correlation between Myc and lncRNAs, miRNA, and mRNAs. (B) Remaining correlation among lncRNAs, miRNAs, and mRNAs.
